# Supplementary material for: Ultrasensitive detection of prostate specific antigen using a personal glucose meter based on DNA-mediated immunoreaction
Source: Royal Society of Chemistry journal article supplement (doi:10.1039/c9an01558b), 2019-01-01
Supplement: c9an01558b1.pdf [file c9an01558b1.pdf]

## Supporting Information

### Ultrasensitive Detection of Prostate Specific Antigen Using Personal Glucose Meter based on DNA-mediated Immunoreaction

Feifei Sun,<sup>a</sup> Xiaomei Sun,<sup>b</sup> Yijing Jia,<sup>a</sup> Zhian Hu,<sup>c</sup> Shenghao Xu,<sup>d</sup> Lin Li<sup>a</sup>, Na Na,<sup>a</sup> and Jin Ouyang\*<sup>a</sup>

<sup>a</sup> Key Laboratory of Theoretical and Computational Photochemistry, Ministry of Education, College of Chemistry, Beijing Normal University, Beijing, 100875, China. E-mail: jinoyang@bnu.edu.cn.

<sup>b</sup>The Affiliated Hospital of Qingdao University, Qingdao, 266003, China.

<sup>c</sup>Department of Chemistry, Tsinghua University, Beijing, 100084, China.

<sup>d</sup>Key Laboratory of Optic-electric Sensing and Analytical Chemistry for Life Science, MOE; College of Chemistry and Molecular Engineering, Qingdao University of Science and Technology, Qingdao, 266042, China.

## TABLE OF CONTENT

|                 |    |
|-----------------|----|
| Table S1 .....  | S3 |
| Figure S1 ..... | S4 |
| Figure S2 ..... | S4 |
| Figure S3 ..... | S5 |
| Figure S4 ..... | S5 |
| Figure S5 ..... | S5 |
| Reference ..... | S6 |

## Supplemental Tables

**Table S1.** Comparison of analytical performance of different methods for PSA detection.

| Detection methods     | LOD                      | Concentration range          | Reference |
|-----------------------|--------------------------|------------------------------|-----------|
| Photoelectrochemistry | 1.8 pg mL <sup>-1</sup>  | 0.005-50 ng mL <sup>-1</sup> | 1         |
| Electrochemistry      | 0.02 fg mL <sup>-1</sup> | 0.05-500 fg mL <sup>-1</sup> | 2         |
| Fluorescence          | 3 pg mL <sup>-1</sup>    | 0.01-5 ng mL <sup>-1</sup>   | 3         |
| Circular dichroism    | 0.076 aM                 | 0.1-50 aM                    | 4         |
| Light scattering      | 2 pg mL <sup>-1</sup>    | 0.01-20 ng mL <sup>-1</sup>  | 5         |
| DNA origami           | 50 aM                    | 5×10 <sup>-5</sup> -5 pM     | 6         |
| SERS                  | 2.49 ng mL <sup>-1</sup> | 3-120 ng mL <sup>-1</sup>    | 7         |
| PGM                   | 0.1 pg mL <sup>-1</sup>  | 0.003-50 ng mL <sup>-1</sup> | This work |

## Supplemental Figures

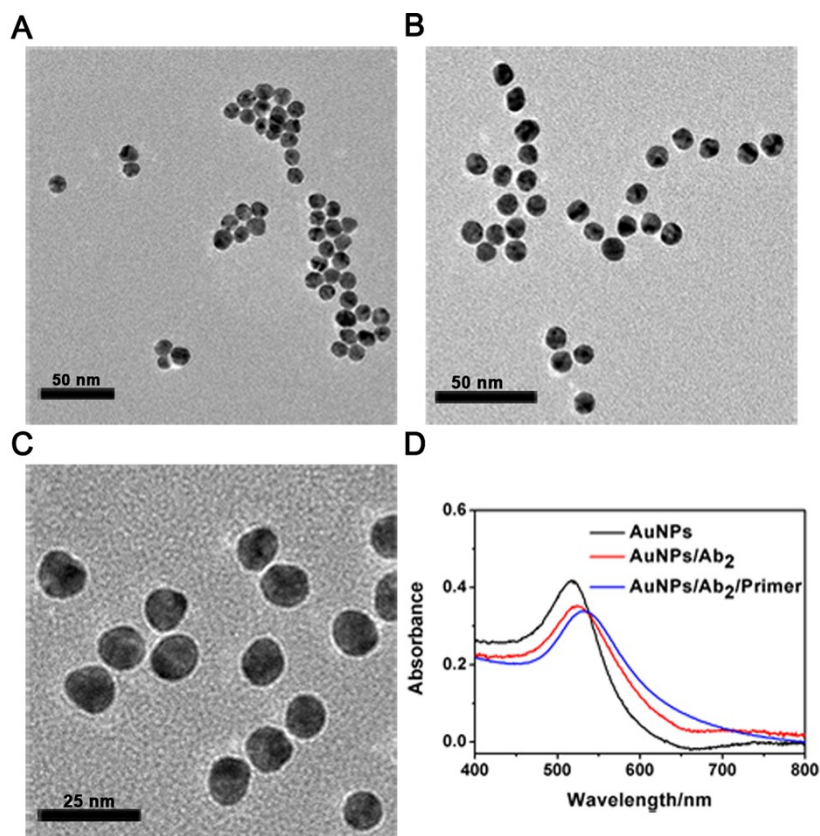

**Figure S1.** TEM images of (A) AuNPs, (B) AuNPs-Ab<sub>2</sub>, (C) AuNPs-Ab<sub>2</sub>-Primer, and corresponding UV-vis spectra (D).

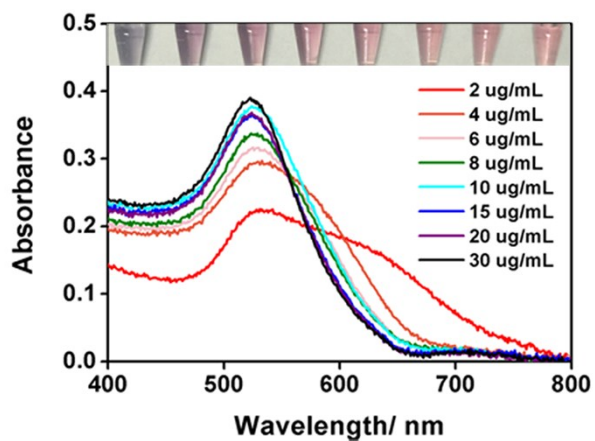

**Figure S2.** UV-vis spectra of AuNPs-Ab<sub>2</sub> with different concentrations of Ab<sub>2</sub>.

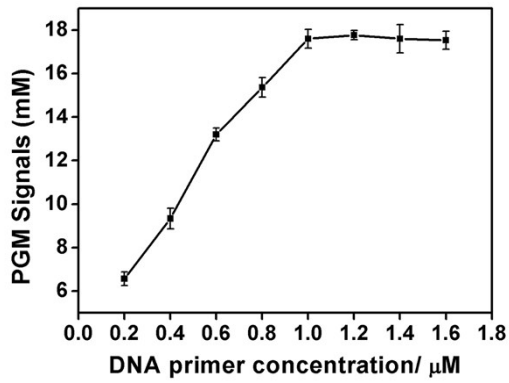

**Figure S3.** Optimization of DNA primer concentration for the construction of AAP.

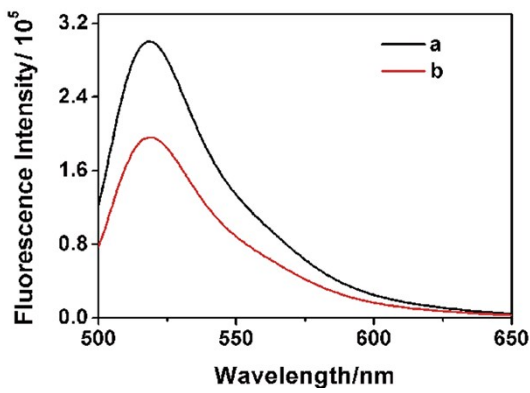

**Figure S4.** Fluorescence spectra of (a) 1 $\mu\text{M}$  Primer/FAM, (b) Primer/FAM in the supernatant of AuNPs-Ab<sub>2</sub>-Primer/FAM.

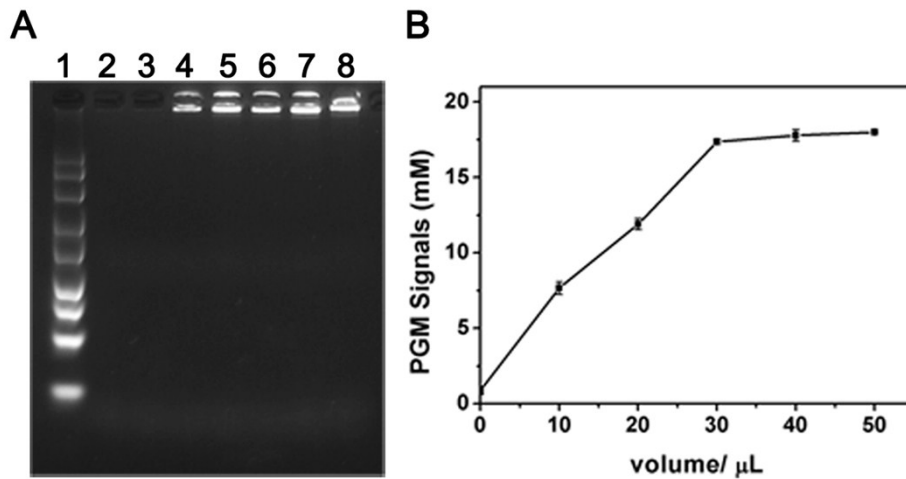

**Figure S5.** (A) Photograph of 5% agarose gel-electrophoresis of RCA products, lane 1, Marker; lane 2, without PSA, lane 3-8, volume of AuNPs-Ab<sub>2</sub>-Primer-cDNA 0  $\mu\text{L}$ , 10  $\mu\text{L}$ , 20  $\mu\text{L}$ , 30  $\mu\text{L}$ , 40  $\mu\text{L}$ , 50  $\mu\text{L}$ . (B) PGM signals with different amount of AuNPs-Ab<sub>2</sub>-Primer-cDNA.

## References:

- 1 K. Zhang, S. Lv, Z. Lin, M. Li, D. Tang, *Biosens. Bioelectron.*, 2018, **101**, 159-166.
- 2 Y. Zhu, H. Wang, L. Wang, J. Zhu, W. Jiang, *ACS Appl. Mater. Inter.*, 2016, **8**, 2573-2581.
- 3 Y. Zhao, W. Gao, X. Ge, S. Li, Du D, H. Yang, *Anal. Chim. Acta*, 2019, **1057**, 44-50.
- 4 L. Tang, S. Li, L. Xu, W. Ma, H. Kuang, L. Wang, C. Xu, *ACS Appl. Mater. Int.*, 2015, **7**,12708-12712.
- 5 G. Liu, D. Feng, Z. Li, Y. Feng, *Talanta*, 2019, **192**, 112-117.
- 6 J. Yan, C. Hu, P. Wang, R. Liu, X. Zuo, X. Liu, S. Song, C. Fan, D. He, G. Sun, *ACS Appl. Mater. Inter.*, 2014, **6**, 20372-20377.
- 7 L. Yang, M. Gao, H. Zou, Y. Li, C. Huang, *Anal. Chem.*, 2018, **90**, 11728-11733.
